# Supplementary material for: Design of hydroxyapatite bioceramics with micro-/nano-topographies to regulate the osteogenic activities of bone morphogenetic protein-2 and bone marrow stromal cells
Source: Royal Society of Chemistry journal article supplement (doi:10.1039/c9nr10561a), 2020-01-01
Supplement: c9nr10561a1.pdf [file c9nr10561a1.pdf]

## Supporting Information

Design of hydroxyapatite bioceramics with micro-/nano- topographies to regulate the osteogenic activities of bone morphogenetic protein-2 and bone marrow stromal cells

*Xiangfeng Li, Minjun Liu, Fuying Chen, Yuyi Wang, Menglu Wang, Xuening Chen\*, Yumei Xiao\*, Xingdong Zhang*

*National Engineering Research Center for Biomaterials, Sichuan University, Chengdu 610064, China*

*\*Corresponding author: xchen6@scu.edu.cn (X. Chen); xymzl2000@126.com (Y. Xiao)*

## S-1

XRD patterns of the four kinds of HA bioceramics were characterized by X-ray diffractometry (XRD; Philips X'Pert 1 X-ray diffractometer, Netherlands) with CuK $\alpha$  radiation at a current of 20 mA and voltage of 30 kV, and the obtained peaks were compared with standard references for HA (09-0432). From the XRD patterns, it could be found that all the four kinds of HA bioceramics were composed of HA phase from determining their diffraction peaks. Furthermore, the crystallinity ( $X_c$ ) of samples were calculated by the following equations:  $X_c = I-V_{112/300}/I_{300}$ , where  $I_{300}$  represent the (300) diffraction peak intensity of XRD patterns of the sample,  $V_{112/300}$  is the intensity of the hollow between (112) and (300) reflections. By calculating, the crystallinities of CS-1, CS-2, MV-1 and MV-2 were 95.0%, 95.3%, 96.5% and 92.5%, respectively. MV-2 had the relatively low crystalline among the four samples.

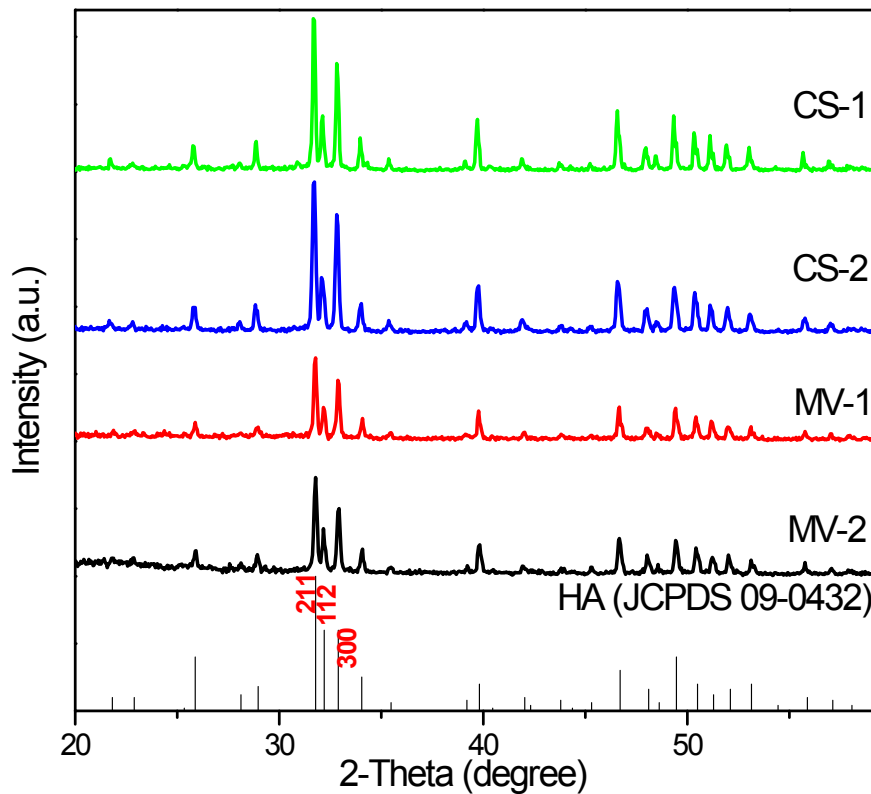

XRD patterns of CS-1, CS-2 MV-1 and MV-2.

S-2 Primers utilized for qRT-PCR amplification

| Gene   | 5' to 3'   | Primers                      |
|--------|------------|------------------------------|
| Runx-2 | Sense      | 5'-AGATGGGACTGTGGTTACCG-3'   |
|        | Anti-Sense | 5'-GGACCGTCCACTGTCACCTT-3'   |
| OSX    | Sense      | 5'-GCTGCCTACTTACCCGTCTG-3'   |
|        | Anti-Sense | 5'-AGGTTTGCCTGCACCACTC-3'    |
| COL-1  | Sense      | 5'-CCAGCTGACCTTCCTGCGCC-3'   |
|        | Anti-Sense | 5'-CGGTGTGACTCGTGCAGCCA-3'   |
| ALP    | Sense      | 5'-ATGGTAACGGGCCTGGCTACA-3'  |
|        | Anti-Sense | 5'-AGTTCTGCTCATGGACGCCGT-3'  |
| BSP    | Sense      | 5'-CCAGCCAGGACTGCCGAAGG-3'   |
|        | Anti-Sense | 5'-CGCTGCCTCCCTGGACTGGA-3'   |
| OPN    | Sense      | 5'-CCCTCGATGTCATCCCTGTT-3'   |
|        | Anti-Sense | 5'-CCCTTCCGTTGTTGTCTG-3'     |
| OCN    | Sense      | 5'-CCTGGCAGGTGCAAAGCCCA-3'   |
|        | Anti-Sense | 5'-GGGGGCTGGGGCTCCAAGT-3'    |
| GAPDH  | Sense      | 5'-GGCAAGTTCAACGGCACAGT-3'   |
|        | Anti-Sense | 5'-TGGTGAAGACGCCAGTAGACTC-3' |
